# Supplementary material for: Leveraging functional annotations in genetic risk prediction for human complex diseases
Source: PLoS Comput Biol. 2017 Jun 8;13(6):e1005589. doi: 10.1371/journal.pcbi.1005589 (PMC5481142; doi:10.1371/journal.pcbi.1005589)
Supplement: S8 Table — (XLSX) [file pcbi.1005589.s015.xlsx]

## Sheet: 工作表1
Table S8. URLs for training and testing datasets.
Disease/Trait	GWAS summary statistics	Validation datasets
Crohn's Disease	http://www.ibdgenetics.org	http://www.wtccc.org.uk/ccc1/wtccc1_studies.html
Breast Cancer	http://gameon.dfci.harvard.edu	http://www.ncbi.nlm.nih.gov/projects/gap/cgi-bin/study.cgi?study_id=phs000147.v3.p1
		http://www.ncbi.nlm.nih.gov/projects/gap/cgi-bin/study.cgi?study_id=phs000383.v1.p1
Rheumatoid Arthritis	http://www.broadinstitute.org/ftp/pub/rheumatoid_arthritis/Stahl_etal_2010NG/	http://www.wtccc.org.uk/ccc1/wtccc1_studies.html
Type-II Diabetes	http://diagram-consortium.org/downloads.html	http://www.ncbi.nlm.nih.gov/projects/gap/cgi-bin/study.cgi?study_id=phs000237.v1.p1
Celiac Disease	https://www.immunobase.org/downloads/protected_data/GWAS_Data/	http://www.ncbi.nlm.nih.gov/projects/gap/cgi-bin/study.cgi?study_id=phs000274.v1.p1
